# Supplementary material for: Development and validation of a portfolio assessment system for medical schools in Korea
Source: PubMed Central journal article supplement (PMC7859386; doi:10.3352/jeehp.2020.17.39), 2020-12-09
Supplement: jeehp-17-39-suppl1.pdf [file jeehp-17-39-suppl1.pdf]

## Supplement 1. Required components for the self-development portfolio

|                                                         |                                                                                                                                                                                                                                                                                                                                                                                                                                                                                          |
|---------------------------------------------------------|------------------------------------------------------------------------------------------------------------------------------------------------------------------------------------------------------------------------------------------------------------------------------------------------------------------------------------------------------------------------------------------------------------------------------------------------------------------------------------------|
| <b>Outline</b>                                          | Cover, name, student no., etc.                                                                                                                                                                                                                                                                                                                                                                                                                                                           |
| <b>Self-introduction</b>                                | Photo, personal statement, etc.                                                                                                                                                                                                                                                                                                                                                                                                                                                          |
| <b>Goal setting</b>                                     | <p>Setting a personal goal during one's time at the school of medicine: focused on 3 educational objectives and 6 areas</p> <ul style="list-style-type: none"> <li>▪ The goal must be worthwhile and challenging for the learner.</li> <li>▪ The goal must be realistic and reachable.</li> <li>▪ The goal must be flexible, so that the learner can adjust it if he or she faces unexpected events or changes.</li> <li>▪ The goal must be specific enough to be actionable.</li> </ul> |
| <b>Process</b>                                          | <p>Specific progress of the learning process and details thereof</p> <ul style="list-style-type: none"> <li>▪ The learner selects content to learn and proceeds accordingly, based on his or her personal goals.</li> </ul>                                                                                                                                                                                                                                                              |
| <b>Reflection</b>                                       | <p>Reflection on learning activities</p> <ul style="list-style-type: none"> <li>▪ After completing the learning activity, the learner reflects on his or her internal self, in addition to the observable achievement of the objectives.</li> </ul>                                                                                                                                                                                                                                      |
| <b>Self-evaluation on the achievement of goals</b>      | <p>Self-evaluation to determine whether the goal has been accomplished.</p> <ul style="list-style-type: none"> <li>▪ 1 point (poor), 2 points (weak), 3 points (satisfactory), 4 points (sufficient), and 5 points (excellent)</li> </ul>                                                                                                                                                                                                                                                |
| <b>Self-study plan</b>                                  | <ul style="list-style-type: none"> <li>▪ Establish a plan to internalize the learning process and promote further progress. The achievement should not be a one-time event.</li> </ul>                                                                                                                                                                                                                                                                                                   |
| <b>Proof of learning activities and other resources</b> | <ul style="list-style-type: none"> <li>▪ Select and gather relevant resources based on the learner's objectives and detailed progression of learning</li> </ul>                                                                                                                                                                                                                                                                                                                          |
