# Supplementary material for: Development and validation of a portfolio assessment system for medical schools in Korea
Source: PubMed Central journal article supplement (PMC7859386; doi:10.3352/jeehp.2020.17.39), 2020-12-09
Supplement: jeehp-17-39-suppl3.pdf [file jeehp-17-39-suppl3.pdf]

# Supple 3. Portfolio assessment form

|               |             |
|---------------|-------------|
| Portfolio no. | 1           |
| Assessor      | (Signature) |

| Assessment area          | Assessment Items                                                                                                                                                                                                                                                                            | Assessment (5-point scale)                |                                                                                                                                                                     |                                                                                                                                    |      |      |
|--------------------------|---------------------------------------------------------------------------------------------------------------------------------------------------------------------------------------------------------------------------------------------------------------------------------------------|-------------------------------------------|---------------------------------------------------------------------------------------------------------------------------------------------------------------------|------------------------------------------------------------------------------------------------------------------------------------|------|------|
|                          |                                                                                                                                                                                                                                                                                             | Excellent                                 | Good                                                                                                                                                                | Average                                                                                                                            | Weak | Poor |
|                          |                                                                                                                                                                                                                                                                                             | 5                                         | 4                                                                                                                                                                   | 3                                                                                                                                  | 2    | 1    |
| Goal-setting             | - Did the student set a worthwhile goal corresponding to the 6 aspects of the educational objectives of training "doctors with a vocational mission," "capable doctors," and "doctors with leadership"?<br>- Is the goal appropriately challenging and specific enough to be actionable?    |                                           |                                                                                                                                                                     |                                                                                                                                    |      |      |
| Process                  | - Has the student engaged in activities and learning appropriate for reaching his or her goal?<br>- Were the details of activities and learning described in a specific and concrete manner?                                                                                                |                                           |                                                                                                                                                                     |                                                                                                                                    |      |      |
| Reflection               | - Did the student reflect on the strengths and weaknesses of his or her learning process and the contents thereof?<br>- Did the student reflect on internal aspects of the learning process, not only superficial achievement of the goals?                                                 |                                           |                                                                                                                                                                     |                                                                                                                                    |      |      |
| Self-study plan          | - Did the student's reflection lead to the identification of specific steps for improvement?<br>- Did the student establish specific plans to improve his or her current practices?                                                                                                         |                                           |                                                                                                                                                                     |                                                                                                                                    |      |      |
| Overview                 | - Did the student comply with the required formatting and successfully organize the materials as a portfolio?<br>- Is the level and quality of relevant learning resources appropriate?<br>- Did the student communicate effectively, using appropriate sentence structures and vocabulary? |                                           |                                                                                                                                                                     |                                                                                                                                    |      |      |
| Comprehensive assessment | (Overall rating)                                                                                                                                                                                                                                                                            | The student completed the portfolio well. | Even though the student satisfactorily prepared each required component of the portfolio, improvement is needed as some components were not specific or sufficient. | The student requires more work due to deficiency in his or her understanding of the concept of the portfolio and learning methods. |      |      |
|                          |                                                                                                                                                                                                                                                                                             | A                                         | B                                                                                                                                                                   | C                                                                                                                                  |      |      |
